# Supplementary material for: Visualizing post genomics data-sets on customized pathway maps by ProMeTra – aeration-dependent gene expression and metabolism of Corynebacterium glutamicum as an example
Source: Springer Nature journal article supplement (doi:10.1186/1752-0509-3-82), 2009-08-23
Supplement: 12918_2008_350_MOESM2_ESM.pdf [file 12918_2008_350_MOESM2_ESM.pdf]

**Upload User Data & Pathway Maps**

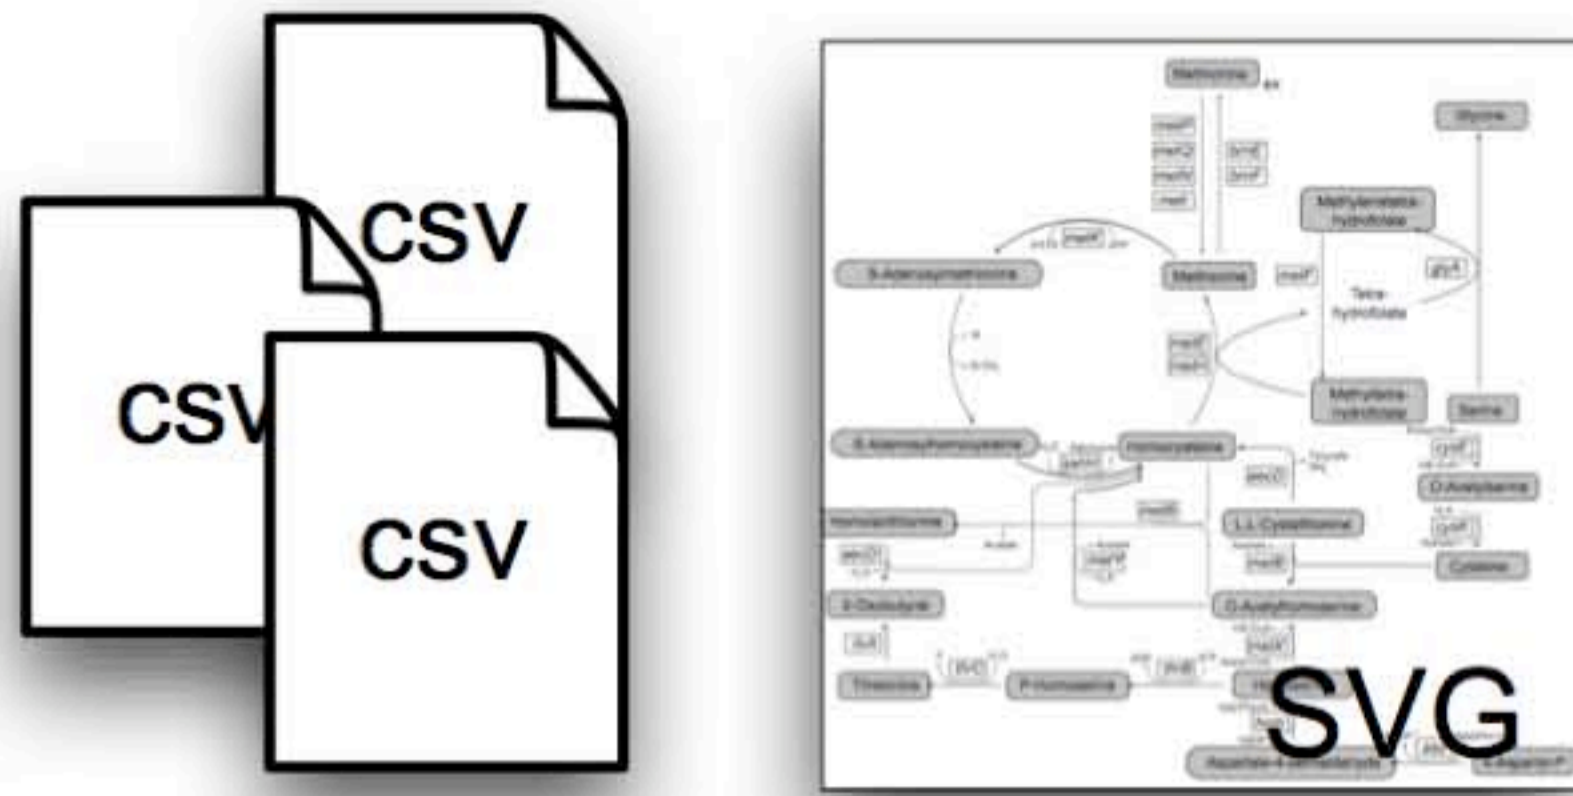

Web Browser

**Analyze / Combine Datasets from ProSE, MeltDB, EMMA2**

**Download Animated / Colored Pathway Maps**

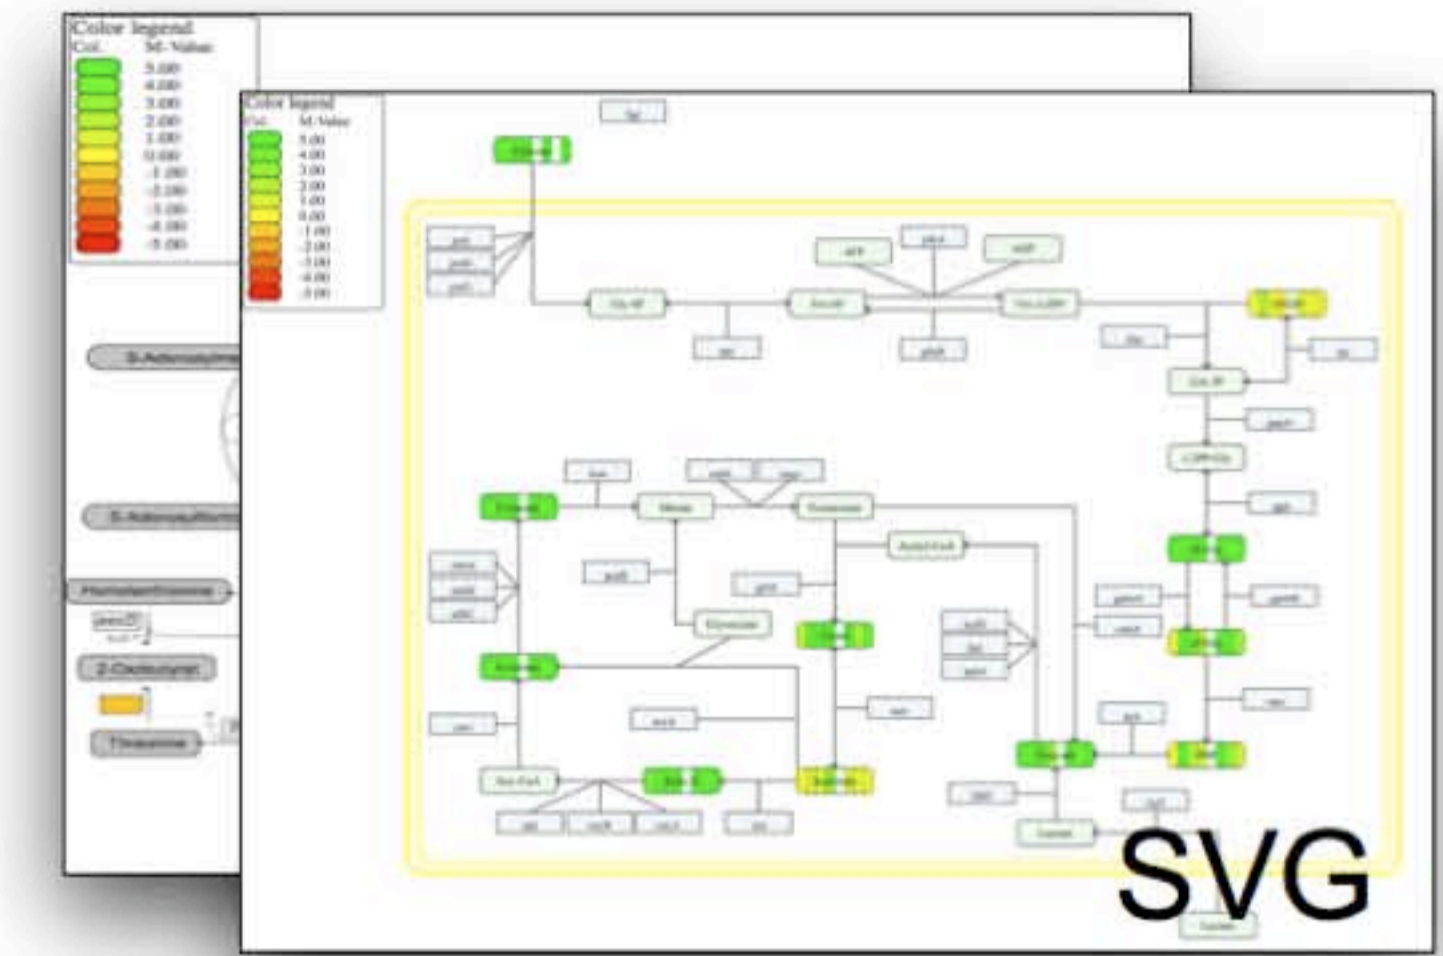

Internet

**ProMeTra Web Interface**

**ProMeTra API**

Pathway Maps Database

**ProSE Web Service**

**EMMA2 Web Service**

**MeltDB Web Service**

CellDesigner Pathway Maps

KEGG XML Pathway Maps

ProMeTra Server
