# Supplementary material for: Visualizing post genomics data-sets on customized pathway maps by ProMeTra – aeration-dependent gene expression and metabolism of Corynebacterium glutamicum as an example
Source: Springer Nature journal article supplement (doi:10.1186/1752-0509-3-82), 2009-08-23

**A**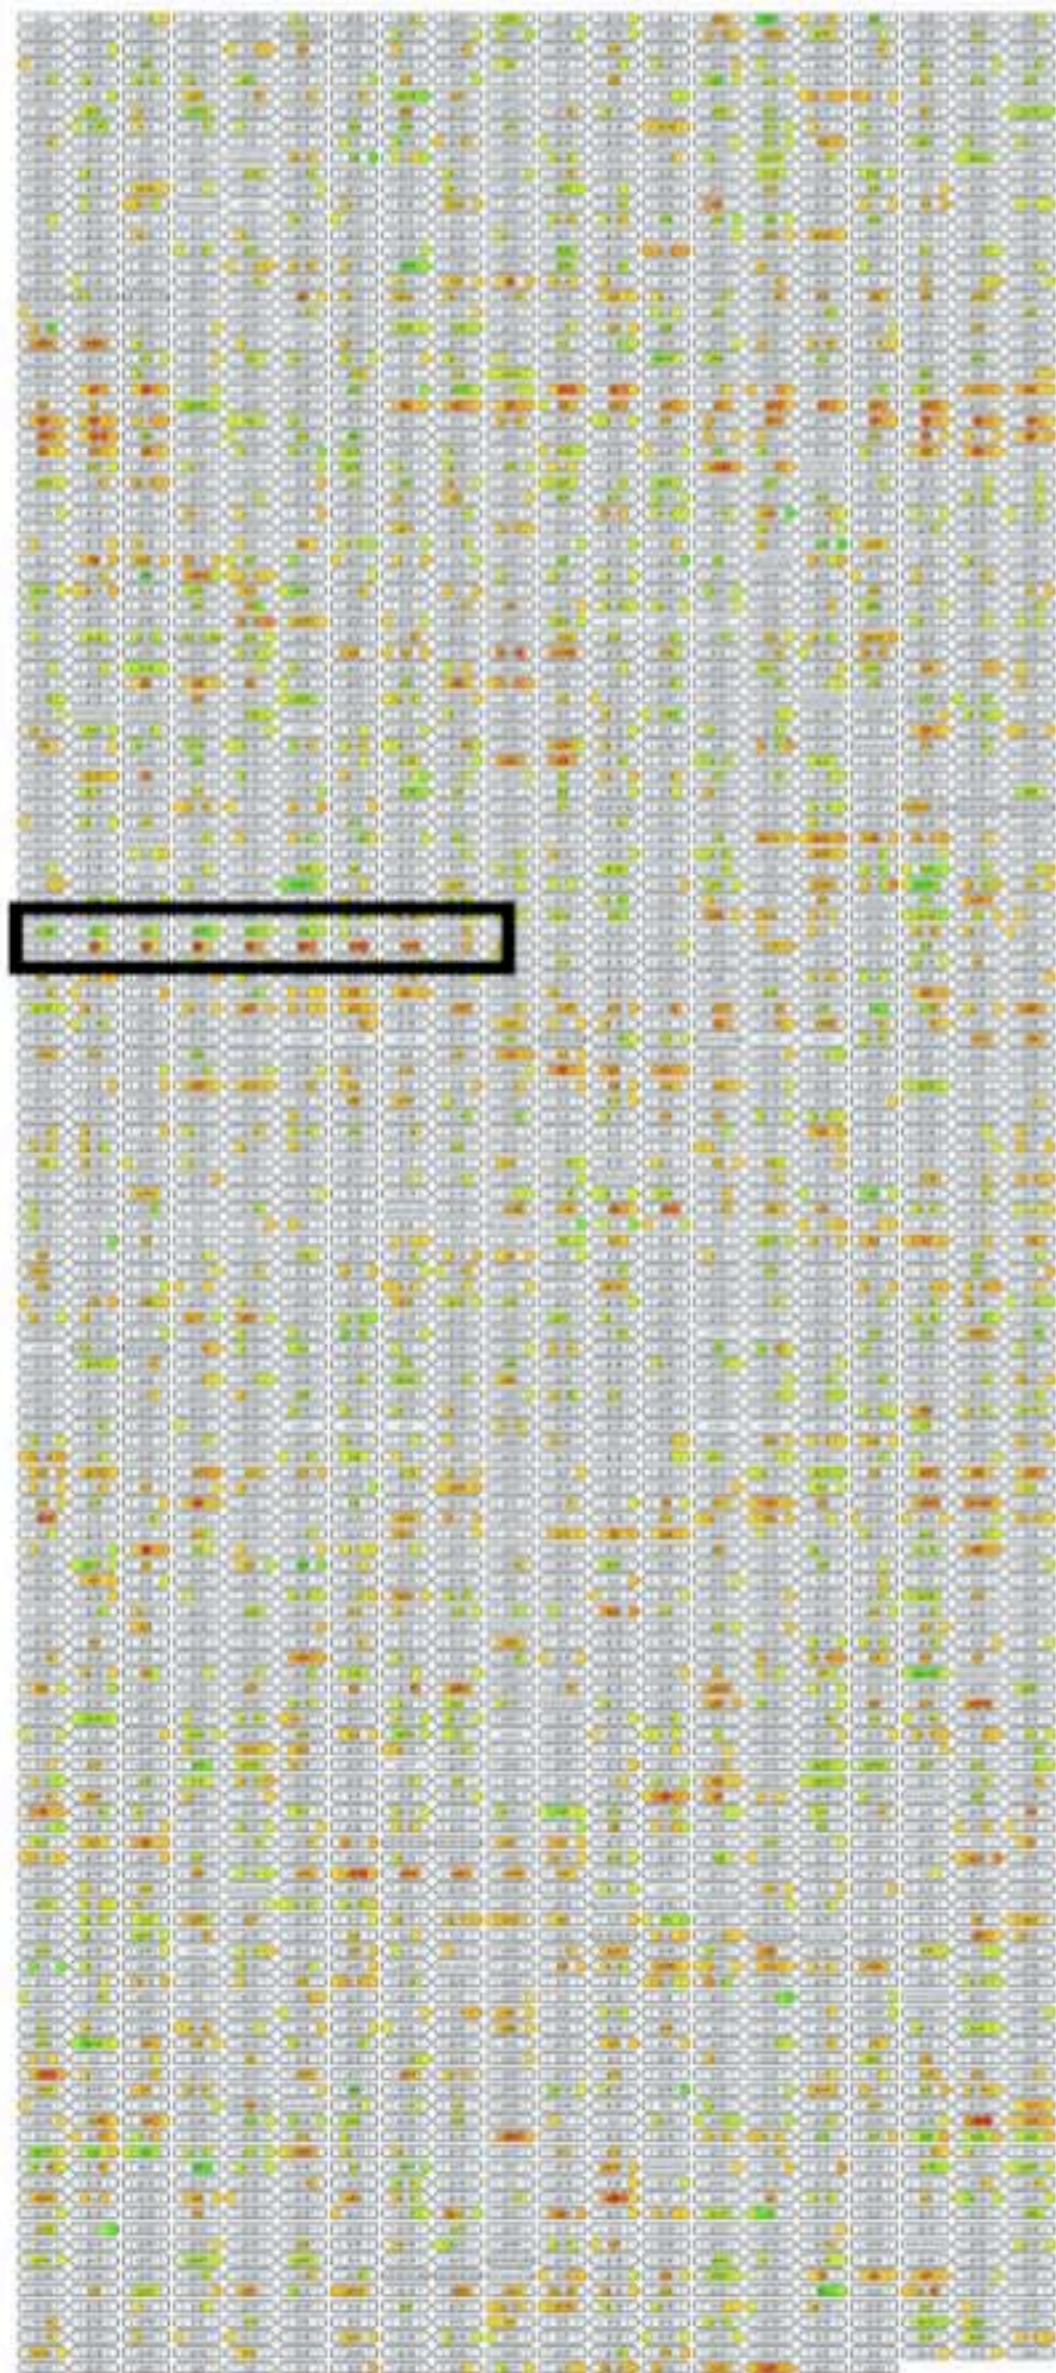**B**

Color legend

Col. M-Value

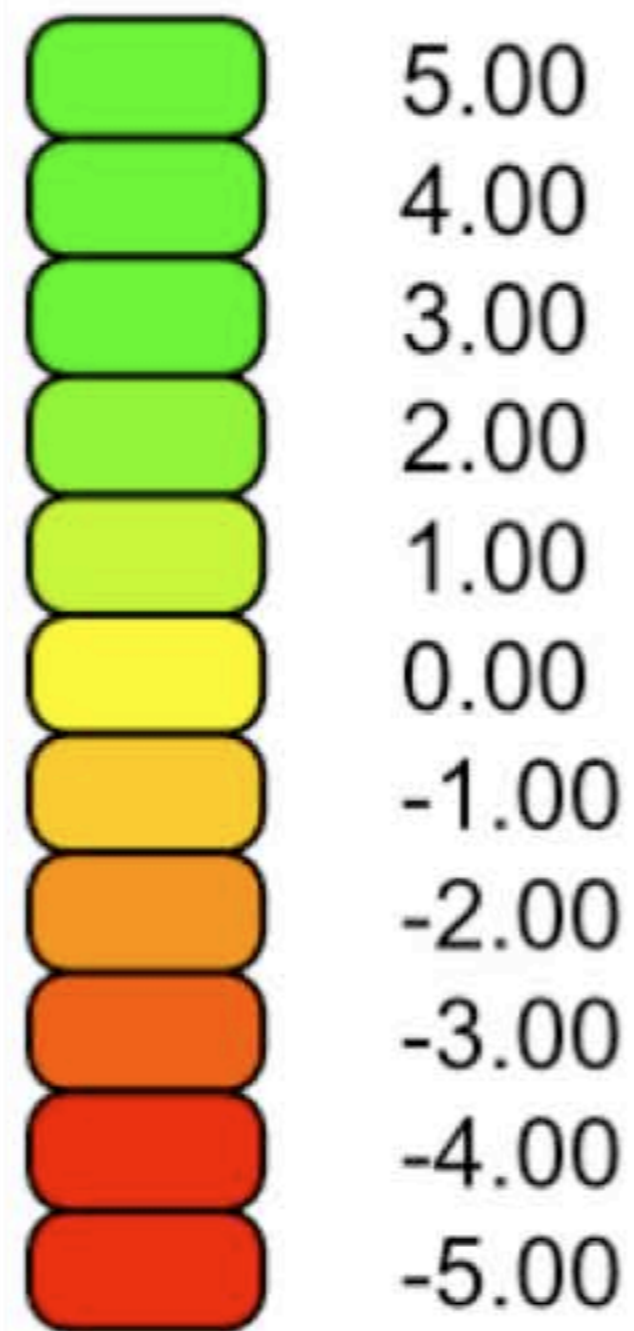

Factors

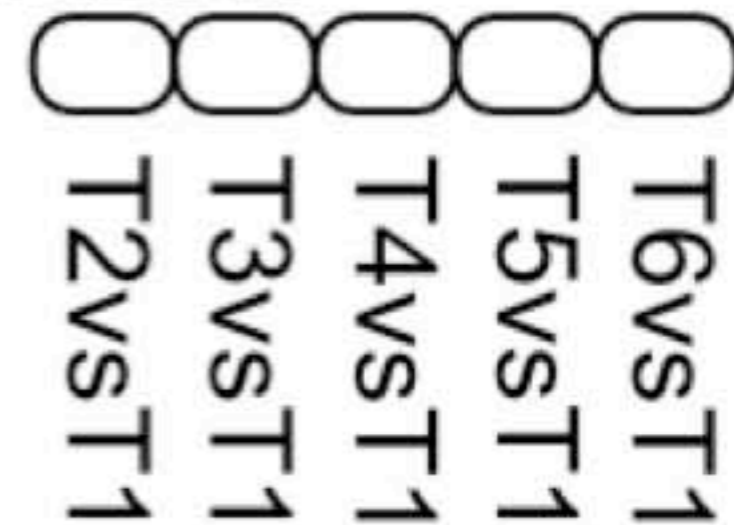**C***narKGHJI* operon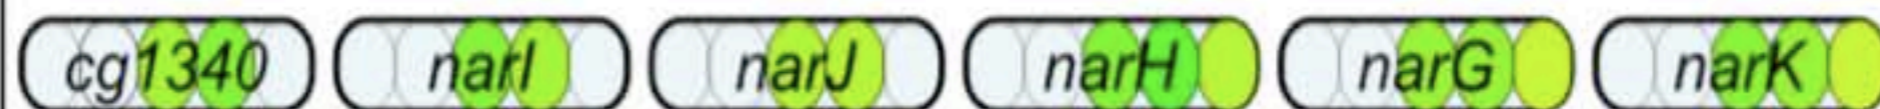*atpBEFHAGDC* operon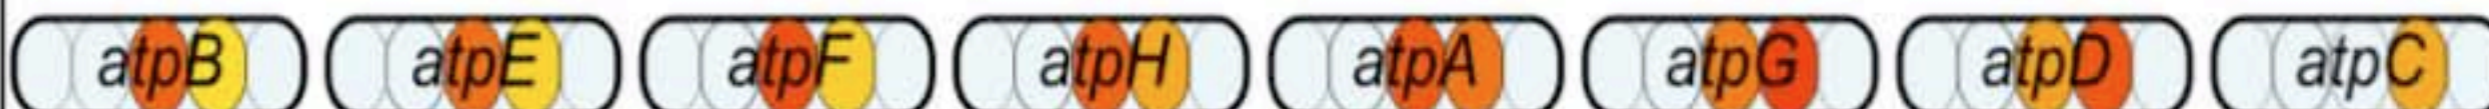

Supplement: 12918_2008_350_MOESM5_ESM.pdf [file 12918_2008_350_MOESM5_ESM.pdf]
